# Supplementary material for: Expression Comparison of Oil Biosynthesis Genes in Oil Palm Mesocarp Tissue Using Custom Array
Source: Microarrays (Basel). 2014 Nov 13;3(4):263–81. doi: 10.3390/microarrays3040263 (PMC4979054; doi:10.3390/microarrays3040263)
Supplement: Supplementary File 1 [file microarrays-03-00263-s001.xlsx]

## Sheet: array vs RNAseq (Bourgis)
KAS II		WRI1		LPCAT		DGAT1		LPAAT		GPAT		PDAT		SAD		HAD
Array	RNAseq	Array	RNAseq	Array	RNAseq	Array	RNAseq	Array	RNAseq	Array	RNAseq	Array	RNAseq	Array	RNAseq	Array	RNAseq
1	1	1	1	1	1	1	1	1	1	1	1	1	1	1	1	1	1
1.39747	1.52955	1.03291	2.76818	3.01708	1.63227	0.999173	0.593375	1.04316	0.658963	1.00638	0.795642	0.878291	1.63849	1.49155	2.07504	1.65522	2.62048
1.90337	1.75442	0.936482	3.64386	3.95077	1.80735	1.07334	0.559427	0.998935	0.752072	1.05973	1.3806	0.902919	0.258068	1.82973	2.75994	1.97158	3.25853
2.17545	3.16574	0.943728	3.34873	3.81742	2.24793	1.00262	1.2332	1.00621	0.961526	1.12348	0.359542	1.12881	0.648015	1.57276	3.44944	2.02662	3.44589
2.30602	2.67021	0.830953	3.90087	4.49213	2.74416	1.01327	1.29639	0.961339	1.27563	1.15445	0.857042	1.18739	0.48755	1.86544	2.52226	2.12162	3.21853
LACS		DGAT2		FAD2		CPT		FATB		FATA		KAS I		EAR		KAR
Array	RNAseq	Array	RNAseq	Array	RNAseq	Array	RNAseq	Array	RNAseq	Array	RNAseq	Array	RNAseq	Array	RNAseq	Array	RNAseq
1	1	1	1	1	1	1	1	1	1	1	1	1	1	1	1	1	1
1.37795	1.96393	1.53106	1.69188	2.95094	3.40725	1.02072	0.92785	2.0473	1.83906	2.17255	1.97461	3.71506	2.62635	1.58667	3.02731	1.74113	2.44248
1.51509	1.95477	1.94554	2.94342	3.3639	4.80193	0.934352	1.61973	3.02214	1.81193	2.95621	2.5961	4.5334	3.22484	1.64637	3.94378	1.99054	3.13732
1.42283	1.8696	1.95654	3.58496	2.95905	5.57368	0.808925	1.57319	3.43623	3.2697	2.95593	3.46248	4.24047	3.54039	1.6685	4.00916	1.91856	3.11517
1.45083	2.64599	2.39566	3.42884	3.53055	5.97612	0.798236	0.500429	4.10249	3.55254	2.94805	3.32193	4.40576	3.822	1.89341	4.39799	1.84595	3.37027
KAS III		MAT		ACC		DHLAT		PK
Array	RNAseq	Array	RNAseq	Array	RNAseq	Array	RNAseq	Array	RNAseq
1	1	1	1	1	1	1	1	1	1
1.54565	2.57665	0.996487	1.84022	1.87432	2.0196	1.05822	2.32873	1.98259	1.9131
1.47421	3.09622	1.01302	2.54565	2.2449	2.74789	1.07274	2.95383	2.37484	2.38389
1.56292	3.67729	1.00026	2.80735	2.22443	3.39545	1.03819	2.90006	2.25631	2.83671
1.94988	4.24005	1.16864	3.49701	2.00883	3.06642	0.982949	3.2329	2.54236	2.74215
*The comparison data of array or RNAseq to their initial stage to compared the trend of expression

## Sheet: week 16 data for FA genes
	KASIII					KAS I					WRI1					KAS II					GPAT					DGAT1					DGAT2					FATA					FATB					FAD2
	ATH	OP	rice			ATH	OP	rice			ATH	op	rice			ATH	op	rice			ATH	op	rice			ATH	op	rice			ATH	OP	rice			ATH	op	rice			ATH	op	rice			ATH	op	rice
H2W16	4.51663	11.0002			H2W16	4.60551	12.6919			H2W16	4.73055	5.71387			H2W16	4.70238	10.7245			H2W16	4.7909	5.47883			H2W16	4.38401	5.07344			H2W16	4.76223	9.29463			H2W16	4.51663	12.5447			H2W16	4.98647	10.4037			H2W16	5.15428	15.4227
H3W16	4.6018	10.8652			H3W16	5.02115	12.032			H3W16	4.47692	6.19117			H3W16	4.93677	10.2147			H3W16	4.54261	5.35564			H3W16	4.63287	5.15147			H3W16	4.85812	9.37324			H3W16	4.4477	12.4978			H3W16	5.1815	9.41205			H3W16	4.74899	15.2185
H4W16	4.85345	11.1335			H4W16	4.90079	12.7901			H4W16	4.6092	6.03847			H4W16	4.52389	10.3827			H4W16	4.98647	5.30011			H4W16	4.52389	5.2691			H4W16	4.55033	9.02596			H4W16	4.58742	12.5608			H4W16	4.87614	9.71778			H4W16	5.00446	15.2048
H5W16	4.80054	11.1687			H5W16	4.89856	12.9086			H5W16	4.67643	6.31377			H5W16	4.71396	10.5708			H5W16	4.80054	5.37365			H5W16	4.57684	5.17192			H5W16	4.34721	9.38791			H5W16	4.17165	12.9285			H5W16	4.80054	10.0801			H5W16	4.76057	15.9632
H6W16	4.44149	10.9711	3.96205		H6W16	4.50874	12.2101	8.35943		H6W16	4.99781	6.23035	5.33395		H6W16	4.50874	10.2598	5.31142		H6W16	4.34499	5.19506	4.77003		H6W16	4.59676	5.2838	5.00381		H6W16	4.37757	9.50357	3.903		H6W16	4.76839	12.2372	3.16347		H6W16	5.18893	9.66355	7.42624		H6W16	4.71224	14.8087	5.31142
H7W16	4.56737	10.9842			H7W16	4.93383	11.9999			H7W16	4.88532	6.39056			H7W16	4.47692	9.96331			H7W16	4.91352	5.26429			H7W16	4.59676	5.1729			H7W16	4.59676	9.26542			H7W16	4.41875	12.4417			H7W16	4.75568	9.26443			H7W16	4.59676	15.1277
H8W16	4.80215	11.1351	3.26072		H8W16	4.94118	12.0508	8.46687		H8W16	4.76839	6.27696	5.57621		H8W16	4.70707	10.238	5.09633		H8W16	4.99498	5.22192	5.08891		H8W16	4.82565	5.49896	4.5444		H8W16	5.07347	8.99449	4.51315		H8W16	4.25412	12.4585	4.08403		H8W16	4.82565	9.26777	7.01005		H8W16	4.40456	15.5163	5.68186
H9W16	4.65385	11.009			H9W16	5.42616	11.9153			H9W16	4.54261	6.14097			H9W16	4.65385	10.2799			H9W16	4.95966	5.32751			H9W16	4.54261	5.21862			H9W16	4.76508	9.171			H9W16	4.57495	12.0978			H9W16	4.95966	9.36797			H9W16	4.29055	15.571
L1W16	4.38401	10.8111			L1W16	4.86278	12.2603			L1W16	4.60049	5.96722			L1W16	4.57117	10.439			L1W16	4.69034	5.21507			L1W16	4.38401	5.30575			L1W16	4.60049	8.62237			L1W16	5.02393	12.5338			L1W16	5.28522	9.89438			L1W16	4.80699	15.2555
L3W16	4.43941	10.8983	2.58185		L3W16	4.93972	11.7099	8.49599		L3W16	4.37105	6.14245	5.1683		L3W16	4.53738	10.4346	5.00381		L3W16	4.4755	5.26953	5.10845		L3W16	4.19383	5.12235	4.11558		L3W16	4.53738	9.15888	4.07336		L3W16	4.50478	12.4614	4.14646		L3W16	4.84101	9.45076	7.04671		L3W16	4.59676	14.9454	5.96196
L4W16	4.34277	10.6192			L4W16	4.41875	11.642			L4W16	4.64847	5.78381			L4W16	4.02674	10.4895			L4W16	4.64847	5.32515			L4W16	4.68859	5.39849			L4W16	4.91651	8.62808			L4W16	4.59863	12.63			L4W16	4.8086	9.78805			L4W16	4.95538	15.0219
L5W16	4.20534	11.0776			L5W16	4.52959	11.7175			L5W16	4.6239	5.50871			L5W16	4.76508	10.3053			L5W16	5.11494	5.17996			L5W16	4.39391	5.18248			L5W16	4.497	9.09489			L5W16	4.497	12.0964			L5W16	5.11494	9.68732			L5W16	5.11494	14.7577
L6W16	4.50874	10.8159	3.84143		L6W16	4.56737	11.8111	8.67075		L6W16	4.47692	6.3992	5.00381		L6W16	4.67819	10.3692	5.00381		L6W16	4.90007	5.26279	5.14359		L6W16	4.70534	5.14771	4.30995		L6W16	4.34721	9.43316	4.71889		L6W16	4.28593	11.8036	4.6772		L6W16	4.75568	9.62355	7.16382		L6W16	4.80699	15.0507	6.39162
L7W16	4.52959	11.1649			L7W16	4.91352	13.1358			L7W16	4.497	6.28808			L7W16	4.56372	11.0706			L7W16	4.56372	5.34596			L7W16	4.91352	5.30435			L7W16	4.71224	9.73105			L7W16	4.36038	12.9179			L7W16	4.99215	10.7685			L7W16	4.74227	15.9423
L8W16	4.65385	10.6922			L8W16	4.81927	11.4831			L8W16	4.33832	6.2292			L8W16	4.17664	10.0226			L8W16	5.01559	5.1868			L8W16	4.40456	5.20014			L8W16	4.76839	8.76482			L8W16	4.33832	11.7415			L8W16	4.79405	9.26328			L8W16	4.8735	14.416
L9W16	4.93972	10.6821			L9W16	5.05737	11.417			L9W16	4.65743	6.29196			L9W16	4.88532	10.1065			L9W16	4.77334	5.29143			L9W16	4.88532	5.25997			L9W16	4.62923	9.36687			L9W16	4.62923	12.0182			L9W16	4.62923	9.16362			L9W16	4.82882	15.5028
	LPAAT					SAD					PDH (DHLAT)					CT-a					KAR					EAR					HAD					PDAT					LPCAT					LAC
	ATH	OP	rice			ATH	op	rice			ATH	op	rice			ATH	op	rice			ATH	op	rice			ATH	op	rice			ATH	op	rice			ATH	op	rice			ATH	op	rice			ATH	op	rice
H2W16	4.87559	5.658			H2W16	4.56531	9.97425			H2W16	4.58101	5.11027			H2W16	5.01462	6.6062			H2W16	5.26342	5.58845			H2W16	4.47692	6.37244			H2W16	4.7909	6.97821			H2W16	4.81813	5.23832			H2W16	6.93393	8.5496			H2W16	4.84258	12.911
H3W16	4.65743	5.12834			H3W16	4.68561	9.88338			H3W16	4.84186	5.07774			H3W16	5.01817	6.70736			H3W16	5.02115	5.8318			H3W16	4.74899	5.68845			H3W16	4.77169	6.68992			H3W16	4.93677	5.36946			H3W16	7.21891	7.35124			H3W16	4.88074	12.7319
H4W16	4.77452	5.08019			H4W16	4.65434	9.52019			H4W16	4.79565	5.08041			H4W16	4.8553	7.48331			H4W16	5.17527	5.68265			H4W16	4.31231	6.01141			H4W16	4.55033	6.63622			H4W16	4.75568	5.20308			H4W16	6.9597	10.1516			H4W16	4.72203	12.9567
H5W16	4.67643	5.27185			H5W16	4.40126	9.83339			H5W16	4.81449	5.05777			H5W16	4.72955	7.1682			H5W16	5.00165	5.68897			H5W16	4.57684	6.19074			H5W16	4.80054	6.8654			H5W16	4.87042	5.5953			H5W16	7.07143	8.6256			H5W16	4.52568	12.8995
H6W16	4.37757	5.20207	4.22571		H6W16	4.71836	9.73924	7.2288		H6W16	4.79282	5.14998	4.07336		H6W16	4.87107	6.73573	6.05169		H6W16	5.23324	5.70015	5.4667		H6W16	4.68859	5.66839	3.903		H6W16	4.56737	6.46359	4.22571		H6W16	4.76839	5.47812	5.12325		H6W16	6.75281	9.33707	8.04494		H6W16	4.68859	13.0972	4.13624
H7W16	5.39279	5.1931			H7W16	4.73618	9.65237			H7W16	4.89942	5.01736			H7W16	4.8771	7.22559			H7W16	5.07347	5.62345			H7W16	4.62572	6.04255			H7W16	4.45386	6.59497			H7W16	4.86888	5.44349			H7W16	6.74988	7.30253			H7W16	4.67643	12.6889
H8W16	4.99498	5.16596	3.12266		H8W16	4.64231	10.2018	7.19428		H8W16	4.66681	5.05371	3.84143		H8W16	4.67623	7.32412	7.35775		H8W16	4.88227	5.83413	5.34846		H8W16	4.76839	6.05415	5.03164		H8W16	4.21736	6.85647	4.02986		H8W16	4.88227	5.57239	5.15618		H8W16	7.22254	7.47011	7.02621		H8W16	4.70707	12.8611	3.26072
H9W16	4.91502	5.4655			H9W16	4.51093	9.3722			H9W16	4.73599	5.13455			H9W16	4.68344	6.6217			H9W16	5.44543	5.58679			H9W16	4.86888	5.80498			H9W16	4.68684	6.71642			H9W16	4.41875	5.41662			H9W16	7.38488	7.62246			H9W16	4.38982	12.9606
L1W16	4.71567	5.18266			L1W16	4.52481	9.5322			L1W16	4.72824	5.02663			L1W16	4.92755	6.87194			L1W16	5.14794	5.59933			L1W16	4.31231	5.66423			L1W16	4.88532	6.50713			L1W16	6.20977	5.40541			L1W16	6.80892	7.63435			L1W16	4.91502	12.7501
L3W16	4.81653	5.29333	4.26375		L3W16	4.49418	8.89231	7.42208		L3W16	4.79678	5.03805	3.2226		L3W16	4.73712	6.81771	6.9064		L3W16	5.11364	5.70339	5.3582		L3W16	4.50478	5.57	4.21604		L3W16	4.76508	6.69425	3.75056		L3W16	4.59676	5.34482	5.22733		L3W16	6.9597	9.50749	7.34632		L3W16	4.62741	13.0725	3.2226
L4W16	4.4518	5.15233			L4W16	4.41501	9.46269			L4W16	4.5392	5.1278			L4W16	4.67261	6.65288			L4W16	5.30213	5.62549			L4W16	4.36257	5.65574			L4W16	4.84258	6.76476			L4W16	4.8086	5.33113			L4W16	6.79085	9.46902			L4W16	4.76839	12.8656
L5W16	5.02393	5.11619			L5W16	4.68164	10.4108			L5W16	4.66512	5.0201			L5W16	5.06168	7.09172			L5W16	5.15681	5.489			L5W16	4.71052	5.83571			L5W16	4.81927	6.88079			L5W16	4.71052	5.16272			L5W16	6.9507	10.0393			L5W16	4.59303	12.5008
L6W16	4.67819	5.2114	4.13624		L6W16	4.47668	9.64783	6.94156		L6W16	4.74259	5.17164	3.40389		L6W16	4.88838	6.81615	7.29712		L6W16	5.29211	5.62573	5.51611		L6W16	4.0706	5.89322	4.71889		L6W16	4.65026	6.67196	4.39812		L6W16	4.62741	5.46356	4.91768		L6W16	7.56428	7.96939	7.50367		L6W16	4.85345	12.9421	4.13624
L7W16	4.43339	5.23251			L7W16	4.58378	9.45479			L7W16	4.69779	4.99339			L7W16	4.90787	7.38167			L7W16	5.97362	5.95313			L7W16	4.56372	6.44768			L7W16	4.74227	7.41637			L7W16	4.96545	5.43971			L7W16	7.395	10.7976			L7W16	4.74227	13.3831
L8W16	4.68509	5.23512			L8W16	4.47575	9.3684			L8W16	4.66982	4.99415			L8W16	4.79375	6.60816			L8W16	4.8735	5.51856			L8W16	4.92239	5.73998			L8W16	4.76839	6.53949			L8W16	4.71224	5.6733			L8W16	7.58425	6.74696			L8W16	4.53543	12.875
L9W16	4.77334	5.31357			L9W16	4.58064	10.0064			L9W16	4.61473	4.99123			L9W16	4.68854	6.6594			L9W16	4.77334	5.4747			L9W16	4.69208	5.86904			L9W16	4.62923	6.43588			L9W16	4.59863	5.6923			L9W16	7.63596	9.13353			L9W16	4.80699	12.6273
	CPT					MAT					PK
	ATH	op	rice			ATH	op	rice			ATH	OP	rice
H2W16	4.58249	9.14676			H2W16	5.04277	5.24533			H2W16	5.27562	13.4102
H3W16	4.69034	9.16261			H3W16	4.77169	5.22204			H3W16	5.3304	13.3368
H4W16	4.90079	9.29019			H4W16	4.6092	5.12464			H4W16	5.241	13.6937
H5W16	4.54455	9.35767			H5W16	5.01559	5.31115			H5W16	5.58671	13.9197
H6W16	4.68859	9.24027	6.86463		H6W16	4.44149	5.25593	4.37223		H6W16	5.13127	13.152	9.14163
H7W16	4.62572	9.35891			H7W16	4.35384	5.27339			H7W16	5.39973	13.3843
H8W16	4.57495	9.34774	6.92647		H8W16	4.64539	5.19816	2.89961		H8W16	5.27501	13.493	9.39202
H9W16	4.54261	9.27847			H9W16	4.6018	5.22976			H9W16	5.67353	12.9341
L1W16	4.75234	9.28189			L1W16	4.57117	5.29411			L1W16	5.08557	13.254
L3W16	4.53738	9.51284	7.09549		L3W16	4.65385	5.29412	3.33408		L3W16	5.41668	12.8563	9.38401
L4W16	5.0414	9.35665			L4W16	4.62572	5.24903			L4W16	5.61204	12.8961
L5W16	4.92388	8.82414			L5W16	5.31011	5.10498			L5W16	5.18566	13.1023
L6W16	4.70534	9.23772	6.95111		L6W16	4.32136	5.18762	3.915		L6W16	5.53058	12.8601	9.30379
L7W16	4.96545	9.36751			L7W16	4.56372	5.41287			L7W16	5.54675	13.7649
L8W16	4.76839	9.21722			L8W16	4.47347	5.31239			L8W16	5.46102	12.9508
L9W16	4.77334	9.24736			L9W16	4.65743	5.37047			L9W16	5.54199	12.6108

## Sheet: week 16 FA genes plot
GENE	Oil Palm	Standard Deviation Oil Palm	Arabidopsis	Standard Deviation Arabidopsis	Rice	Standard Deviation Rice	P-value for Mann-Whitney test (Ara vs OP)	P-value for Mann-Whitney test (Rice vs OP)
PDH (DHLAT)	5.0653	0.0589216	4.7239	0.0984624	3.63532	0.390833	0	0.0304
DGAT 1	5.23509	0.108277	4.57803	0.19858	4.49343	0.382762	0	0.0304
LPAAT	5.24388	0.143511	4.76514	0.25107	3.93709	0.545578	0	0.0304
MAT	5.25537	0.0805082	4.66616	0.261149	3.63023	0.646312	0	0.0304
GPAT	5.28711	0.0802283	4.78223	0.220906	4.18616	0.164774	0	0.0304
PDAT	5.42686	0.154986	4.84679	0.390816	3.64397	0.366389	0	0.0304
EAR	5.9068	0.261503	4.57535	0.22723	4.46739	0.50443	0	0.0304
WRI1	6.05647	0.243603	4.6188	0.174478	5.27057	0.244302	0	0.0304
HAD	6.73199	0.240533	4.68383	0.17129	4.10106	0.277907	0	0.0304
ACC CT-a	6.92324	0.306025	4.83769	0.130562	6.90324	0.601904	0	0.665
KAR	6.9433	0.322353	5.17056	0.277905	3.71428	0.230713	0	0.0304
LPCAT	8.60674	1.20987	7.12398	0.309723	4.62179	0.196314	0.0003	0.0304
DGAT 2	9.17602	0.312193	4.6462	0.207604	4.3021	0.378532	0	0.0304
CPT	9.26425	0.147975	4.7261	0.161235	4.14518	0.354892	0	0.0304
FAT B	9.67605	0.442391	4.92472	0.186385	4.41159	0.280408	0	0.0304
SAD	9.68452	0.367605	4.57167	0.106286	4.44134	0.936813	0	0.0304
KAS II	10.4224	0.264233	4.58924	0.232002	5.10384	0.145094	0	0.0294
KAS III	10.9393	0.178657	4.57754	0.199875	3.41151	0.632193	0	0.0304
KAS I	12.1815	0.528323	4.83402	0.255395	4.49885	0.783348	0	0.0304
FAT A	12.3731	0.348069	4.49861	0.209056	4.01779	0.628657	0	0.0304
LAC	12.8827	0.206303	4.70468	0.14421	3.68895	0.516718	0	0.0294
PK	13.2262	0.371784	5.39335	0.181643	3.67664	0.804327	0	0.0304
FAD 2	15.2328	0.415202	4.77488	0.231027	5.83671	0.455898	0	0.0304

## Sheet: week 16 data for TCA and glyco
	malate dehydrogenase [EC:1.1.1.37]					succinyl-CoA synthetase alpha subunit						isocitrate dehydrogenase						Aconitase
	Ath	OP	rice			Ath	OP	rice				Ath	OP	rice				Ath	OP	rice
H2	4.70238	5.04945			H2	4.76223	11.2741				H2	4.64539	9.38701				H2	4.27675	12.3542
H3	4.65743	5.01455			H3	4.38401	11.2633				H3	4.54261	9.40216				H3	4.31231	12.5969
H4	4.34721	5.23969			H4	4.58742	11.3684				H4	4.55033	9.65479				H4	4.52389	12.4494
H5	4.65026	5.22575			H5	4.87042	11.5246				H5	4.57684	9.56756				H5	4.71396	12.7521
H6	4.53932	5.2843	4.91181		H6	4.74227	11.2693	8.00577			H6	4.89705	9.92168	3.903			H6	4.44149	12.8304	8.63594
H7	4.41875	5.53234			H7	4.47692	11.4752				H7	4.91352	9.94235				H7	4.21493	12.7187
H8	4.40456	5.22366	4.97554		H8	4.88227	11.3845	7.97608			H8	4.54068	9.94568	4.45678			H8	4.40456	12.723	8.46681
H9	4.76508	5.17051			H9	5.00305	11.4612				H9	4.48298	9.58879				H9	4.86888	12.717
L1	4.57117	5.12356			L1	4.88532	11.4422				L1	4.91502	9.71561				L1	4.41452	12.5694
L3	4.27209	5.09454	4.81411		L3	4.41029	11.0849	8.13341			L3	4.68333	9.71445	4.21604			L3	4.65385	12.5182	8.56379
L4	4.27675	4.83171			L4	4.82565	11.1446				L4	4.64847	9.36855				L4	4.59863	12.7294
L5	4.39391	5.28418			L5	4.8735	11.1801				L5	4.71052	9.83983				L5	4.76508	12.5761
L6	4.41664	5.16475	4.96779		L6	4.53932	11.0852	8.23211			L6	4.77617	9.88028	4.07336			L6	4.85345	12.3676	8.79293
L7	4.56372	5.33868			L7	4.497	11.0317				L7	4.6239	9.64143				L7	4.46941	12.839
L8	4.56547	4.97491			L8	4.65385	11.0461				L8	4.89554	9.93658				L8	5.03866	12.406
L9	4.71567	5.19291			L9	5.03766	11.2971				L9	4.69208	9.60921				L9	4.82882	12.6508
SE	0.158085	0.162531	0.0744321			0.210721	0.162458	0.11848				0.146218	0.202719	0.234346				0.241869	0.158334	0.137452
average	4.51627	5.17159	4.91731			4.71445	11.2708	8.08684				4.6934	9.69475	4.16229				4.5862	12.6124	8.61487
	citrate synthase 1					Fumarase						Malic enzyme						ATP citrate lyase
	Ath	OP	rice			Ath	OP	rice				Ath	OP	rice				Ath	OP	rice
H2	4.81813	9.82064			H2	5.21033	4.94593				H2	4.58249	5.34175				H2	4.84258	5.40232
H3	4.65743	9.8056			H3	4.57117	5.00115				H3	4.71396	5.08591				H3	5.27624	5.32244
H4	4.964	9.86727			H4	5.29411	5.04777				H4	4.70065	5.5596				H4	5.3454	5.29752
H5	4.81813	9.40644			H5	5.02531	5.1093				H5	4.92536	5.22579				H5	5.26694	5.33513
H6	4.50874	9.62745	4.00761		H6	5.38796	5.18162	5.28479			H6	4.65385	5.32501	4.98943			H6	5.18893	5.39293	5.29093
H7	4.67643	9.78022			H7	5.39279	5.35344				H7	4.70238	5.28348				H7	4.77169	5.19164
H8	4.94118	9.83479	4.28241		H8	5.39922	4.98848	5.37312			H8	5.09828	5.30396	4.99293			H8	4.85812	5.34262	4.98167
H9	4.65385	9.43992			H9	5.04823	5.23881				H9	4.76508	5.30298				H9	5.22124	5.32936
L1	4.4518	9.74516			L1	4.99498	5.20357				L1	4.51072	5.27941				L1	4.65743	5.22683
L3	4.59676	10.2598	4.51315		L3	5.48318	5.24411	5.19385			L3	5.11364	5.19118	5.20112			L3	5.05872	5.18062	5.10037
L4	4.96977	9.77867			L4	5.20911	5.16586				L4	4.4518	5.31559				L4	5.2599	5.26925
L5	4.52959	8.70747			L5	5.19596	5.17583				L5	4.59303	5.23908				L5	5.04823	5.21412
L6	4.38767	10.0212	4.58253		L6	5.03354	5.29456	5.14352			L6	4.98932	5.29823	5.03403			L6	5.12138	5.32533	5.2753
L7	4.74227	8.96077			L7	5.39494	5.1986				L7	4.43339	5.2951				L7	5.17402	5.26489
L8	5.01559	8.2247			L8	5.60394	5.33872				L8	4.84415	5.17743				L8	4.92239	5.1144
L9	5.05737	10.1766			L9	5.37147	5.23103				L9	4.65743	5.40237				L9	5.30442	5.24054
SE	0.212276	0.542056	0.259768			0.25032	0.122204	0.101412				0.21122	0.103691	0.0999017				0.212041	0.0797482	0.148075
mean	4.73679	9.59104	4.34642			5.22601	5.16992	5.24882				4.73347	5.28918	5.05438				5.08235	5.27812	5.16207
	glyceraldehyde-3-phosphate dehydrogenase (NAD(P))					Triosephosphate isomerase						6-phosphofructokinase 1						hexokinase
	Ath	OP	rice			Ath	OP	rice				Ath	OP	rice				Ath	OP	rice
H2	4.38401	5.96717			H2	4.77984	5.39572				H2	4.77808	9.39836				H2	4.76223	5.11534
H3	4.65743	5.07644			H3	4.60109	5.60982				H3	4.79396	9.67022				H3	4.54261	5.17029
H4	4.41875	5.13046			H4	4.57877	5.53733				H4	4.88303	9.66212				H4	4.64719	5.1913
H5	4.46941	5.05007			H5	4.7945	5.60866				H5	4.76823	9.5639				H5	4.62741	4.99762
H6	4.07817	5.12076	5.17233		H6	4.67726	5.75179	4.35689			H6	4.69122	9.86416	4.38081			H6	4.74227	5.26026	5.60243
H7	4.59676	5.17976			H7	4.58753	5.54393				H7	4.61607	9.59318				H7	4.65026	5.25981
H8	4.76839	5.41145	5.89142		H8	4.74022	5.56522	3.52341			H8	4.65368	9.78351	4.30854			H8	4.7389	5.21825	4.61968
H9	4.41875	5.09926			H9	4.79401	5.53529				H9	4.6365	9.84468				H9	4.71224	5.10093
L1	4.31231	4.95799			L1	4.67593	5.49693				L1	4.75626	9.72429				L1	4.60049	5.1492
L3	4.41029	5.18835	4.90301		L3	4.70591	5.52249	4.32435			L3	4.66752	9.87358	4.44892			L3	5.11364	5.21948	5.32047
L4	4.47692	5.08904			L4	4.08057	5.57801				L4	4.74245	9.92126				L4	4.59863	5.16387
L5	4.56372	5.56243			L5	4.77249	5.4897				L5	4.81821	9.47358				L5	4.71052	5.27352
L6	4.75568	5.32573	5.88008		L6	4.72987	5.46168	3.83025			L6	4.89562	9.62847	4.23574			L6	4.41664	5.19554	4.39812
L7	4.43339	5.08229			L7	4.55457	5.48483				L7	4.75701	9.69334				L7	4.88074	5.04799
L8	4.17664	5.19746			L8	4.89754	5.51078				L8	4.46558	9.7546				L8	4.33832	5.10559
L9	4.56737	5.00843			L9	4.88667	5.59678				L9	4.50665	9.60636				L9	4.59863	5.10305
SE	0.186566	0.252665	0.501852			0.190002	0.0796585	0.403413				0.120257	0.147115	0.0919076				0.177239	0.0787001	0.569106
mean	4.468	5.21544	5.46171			4.67855	5.54306	4.00873				4.71438	9.69097	4.3435				4.66754	5.16075	4.98517
	phosphoglucose isomerase 1					enolase 1						phosphoglycerate kinase						fructose-bisphosphate aldolase
	Ath	OP	rice			Ath	OP	rice				Ath	OP	rice				Ath	OP	rice
H2	4.81813	6.34368			H2	6.31736	5.36608				H2	4.81526	10.302				H2	4.98647	5.76567
H3	4.34721	5.98825			H3	6.39475	5.516				H3	4.69339	9.83926				H3	5.47712	5.87725
H4	4.72203	6.16819			H4	5.93466	5.42182				H4	4.72338	10.1221				H4	5.20911	5.89848
H5	4.24728	5.87651			H5	5.843	5.67118				H5	4.85524	10.142				H5	5.02531	6.11039
H6	5.0455	6.06744	4.48121		H6	6.03243	5.29	4.43179			H6	4.81826	10.171	4.45207			H6	5.16404	6.15071	4.18279
H7	4.59676	5.78087			H7	5.94164	5.1517				H7	4.63889	9.92817				H7	4.93383	5.91578
H8	4.80215	6.09827	4.30995		H8	6.42366	5.53699	4.57513			H8	4.73944	10.101	5.58402			H8	4.88227	5.77436	3.94746
H9	4.65385	6.19285			H9	6.69398	5.25396				H9	5.0167	10.1488				H9	4.76508	5.62057
L1	4.91502	5.91411			L1	4.96977	5.81898				L1	4.82957	10.0531				L1	5.12138	5.83631
L3	4.56547	6.01026	4.14646		L3	5.87664	5.46076	4.94673			L3	4.79595	10.0421	4.96346			L3	5.44284	5.4235	3.81746
L4	4.76839	6.11125			L4	5.48318	5.26255				L4	4.81055	10.3489				L4	5.22362	5.47133
L5	4.76508	6.32865			L5	5.51554	5.28695				L5	4.74914	10.2689				L5	5.11494	5.86003
L6	4.80699	6.31172	3.51848		L6	5.37147	5.28704	4.68574			L6	4.77961	10.0497	5.28336			L6	5.05502	5.63403	4.20713
L7	5.12526	5.8857			L7	6.20703	5.37537				L7	4.78603	10.4444				L7	5.21882	5.87657
L8	4.62741	5.69636			L8	5.97146	5.28517				L8	4.79832	9.796				L8	5.05737	5.97055
L9	4.98647	5.8487			L9	6.34071	5.5355				L9	4.94975	9.7577				L9	4.82882	5.78558
SE	0.23343	0.198354	0.419893			0.451302	0.174621	0.217686				0.0909456	0.195666	0.484051				0.198045	0.199669	0.188328
mean	4.73706	6.03893	4.11402			5.95733	5.4075	4.65985				4.79997	10.0947	5.07073				5.09413	5.81069	4.03871

## Sheet: week 16 TCA and Glyco plot
Gene	Oil Palm	Arabidopsis	Rice	Ara SE	OP SE	Rice SE	Mann-Whiteney test (Ara vs OP)	Mann-whiteney test (Rice vs OP)
hexokinase	5.16075	4.66754	4.98517	0.177239	0.0787001	0.569106	0	1
Fumarase	5.16992	5.22601	5.24882	0.25032	0.122204	0.101412	0.1689	0.3694
malate dehydrogenase	5.17159	4.51627	4.91731	0.158085	0.162531	0.0744321	0	0.0094
glyceraldehyde-3-phosphate dehydrogenase	5.21544	4.468	5.46171	0.186566	0.252665	0.501852	0	0.5391
ATP Citrate Lyase	5.27812	5.08235	5.16207	0.212041	0.0797482	0.148075	0.0044	0.143
Malic Enzyme	5.28918	4.73347	5.05438	0.21122	0.103691	0.0999017	0	0.0071
enolase 1	5.4075	5.95733	4.65985	0.451302	0.174621	0.217686	0.0004	0.0029
Triosephosphate isomerase	5.54306	4.67855	4.00873	0.190002	0.0796585	0.403413	0	0.0029
fructose-bisphosphate aldolase	5.81069	5.09413	4.03871	0.198045	0.199669	0.188328	0	0.0029
phosphoglucose isomerase 1	6.03893	4.73706	4.11402	0.23343	0.198354	0.419893	0	0.0029
Citrate Synthase I	9.59104	4.73679	4.34642	0.212276	0.542056	0.259768	0	0.0029
6-phosphofructokinase 1	9.69097	4.71438	4.3435	0.120257	0.147115	0.0919076	0	0.0029
isocitrare dehydrogenase	9.69475	4.6934	4.16229	0.146218	0.202719	0.234346	0	0.0029
phosphoglycerate kinase	10.0947	4.79997	5.07073	0.0909456	0.195666	0.484051	0	0.0029
succinyl-CoA synthetase alpha subunit	11.2708	4.71445	8.08684	0.210721	0.162458	0.11848	0	0.0029
Aconitase	12.6124	4.5862	8.61487	0.241869	0.158334	0.137452	0	0.0029

## Sheet: Array vs qPCR data
			Raw qPCR and microarray data at different WAA								differential expression value compared to initial stage-week12
isotig		w12	w14	w16	w18	w20	w22			w12	w14	w16	w18	w20	w22
(6lib)_isotig15698	Array	12.4958	12.4722	12.7703	12.5615	11.5939	11.3722			6	5.9764	6.27452	6.06571	5.09816	4.87644
	qPCR	1.40377	1.20795	1.6482	0.881718	0.755833	0.536899			6	5.80418	6.24443	5.47795	5.35206	5.13313
(6lib)_isotig19305	Array	10.6837	10.4856	10.461	10.309	9.98063	9.83853			6	5.80192	5.77734	5.62529	5.29692	5.15482
	qPCR	1.41367	1.36923	0.965843	0.771566	0.850536	0.815088			6	5.95556	5.55217	5.3579	5.43687	5.40142
(6lib)_isotig25008	Array	5.37088	5.3573	5.33915	5.34589	5.21716	5.23413			6	5.98642	5.96828	5.97502	5.84628	5.86325
	qPCR	1.4363	1.24699	1.26527	0.834092	0.702966	0.752594			6	5.81068	5.82897	5.39779	5.26666	5.31629
(6lib)_isotig25777	Array	9.50551	9.59441	9.25652	8.41746	8.06666	8.12692			6	6.0889	5.75101	4.91195	4.56115	4.62141
	qPCR	1.58924	1.80261	1.31882	0.58978	0.657851	0.682192			6	6.21337	5.72959	5.00054	5.06862	5.09296
(6lib)_isotig29135	Array	6.39827	6.48275	6.3416	6.11211	6.03034	5.99162			6	6.08448	5.94333	5.71385	5.63207	5.59336
	qPCR	1.38708	1.59989	1.06116	0.912548	0.722994	0.643631			6	6.21281	5.67407	5.52546	5.33591	5.25655
(6lib)_isotig29190	Array	5.48335	5.40153	5.44665	5.48813	5.44032	5.42055			6	5.91818	5.96331	6.00479	5.95698	5.9372
	qPCR	1.12465	0.889288	1.00166	0.873607	1.0832	1.05486			6	5.76464	5.87701	5.74896	5.95856	5.93022
(6lib)_isotig09758	Array	8.81088	8.97756	8.84659	8.72877	9.14959	8.81557			6	6.16668	6.03571	5.91789	6.33871	6.00469
	qPCR	0.923613	1.04423	0.982896	0.70659	1.51592	0.984829			6	6.12062	6.05928	5.78298	6.59231	6.06122
(6lib)_isotig30897	Array	7.68833	7.45133	6.97984	6.60731	6.1419	6.46752			6	5.763	5.29151	4.91898	4.45356	4.77918
	qPCR	2.804	1.53323	1.04541	0.631302	0.568797	0.619633			6	4.72923	4.24141	3.8273	3.7648	3.81563
(6lib)_isotig10379	Array	7.86962	7.99311	8.03525	7.45439	7.4625	7.08401			6	6.12349	6.16563	5.58477	5.59288	5.21439
	qPCR	0.930002	1.32292	1.1238	0.749356	1.12491	0.858004			6	6.39291	6.1938	5.81935	6.1949	5.928
(6lib)_isotig31163	Array	11.0136	10.8611	10.8394	10.4504	9.97393	9.96885			6	5.84744	5.82575	5.43679	4.9603	4.95522
	qPCR	1.42024	1.44232	1.17927	0.806021	0.688314	0.746159			6	6.02207	5.75902	5.38578	5.26807	5.32592
(6lib)_isotig46328	Array	14.817	14.5657	14.391	13.5684	11.7267	9.71207			6	5.7487	5.57391	4.75138	2.90963	0.895025
	qPCR	2.98898	4.08779	3.25086	0.97828	0.452264	0.0569032			6	7.09881	6.26188	3.9893	3.46328	3.06792
(6lib)_isotig47186	Array	8.22331	8.69556	7.94141	7.22725	6.55282	5.44861			6	6.47225	5.7181	5.00394	4.32951	3.2253
	qPCR	2.83874	2.60208	1.67307	0.650671	0.501475	0.247986			6	5.76334	4.83433	3.81193	3.66274	3.40925
	*graph plot using differential expression value compared to initial stage-week12 to compared the expression trend between microarray and qPCR

## Sheet: qPCR primer efficiency
Isotig	Gene ID (UniProt)	slope	Amplification efficiency (%)	dissociation curve
29190	Aminotransferase	-4.258	71.73	single
31163	Calcyclin-binding protein	-3.343	99.13	single
9758	HBP-1a transcription factor	-3.424	95.91	single
25777	membrane protein	-3.797	83.38	single
10379	Peptide chain release factor subunit 1	-3.313	100.37	single
30897	Receptor-like protein kinase	-3.283	101.65	single
19305	Uncharacterized protein	-3.714	85.88	single
29135	unknown protein	-3.408	96.52	single
46328	unknown protein	-4.009	77.6	single
15698	WRK51	-3.92	79.9	single
25008	Heat Shock Protein	-3.382	97.55	single
47186	Unknown protein	-3.416	96.2	single
